# Supplementary material for: Performance Comparison of Machine Learning Approaches on Hepatitis C Prediction Employing Data Mining Techniques
Source: MDPI journal article supplement (doi:10.3390/bioengineering10040481), 2023-04-17
Supplement: s1 [file s1]

## Supplementary materials:

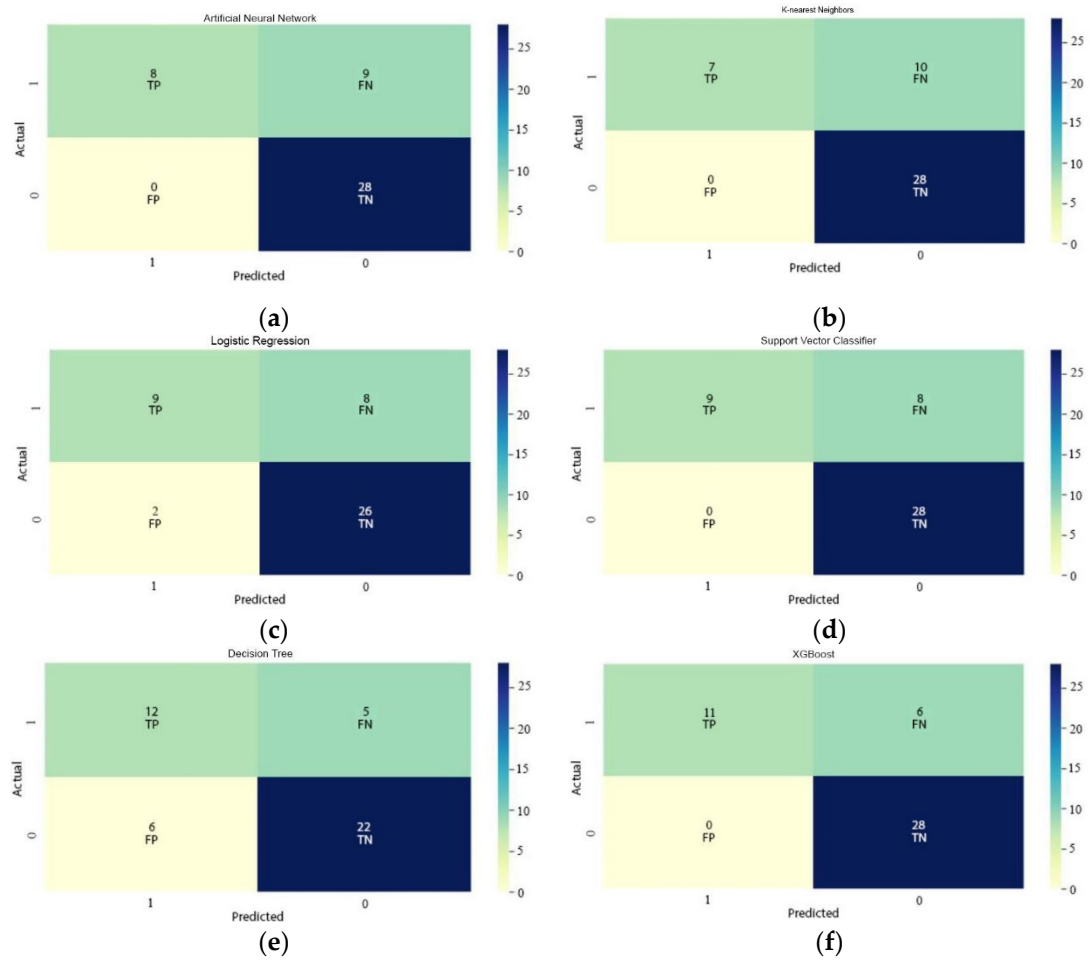

**Figure S1.** Confusion matrix of six machine learning algorithms, (a) Artificial Neural Network (b) k-nearest Neighbors (c) Logistic Regression (d) Support Vector Machines (e) Decision Tree (f) XGBoost, with the NHANES Dataset.

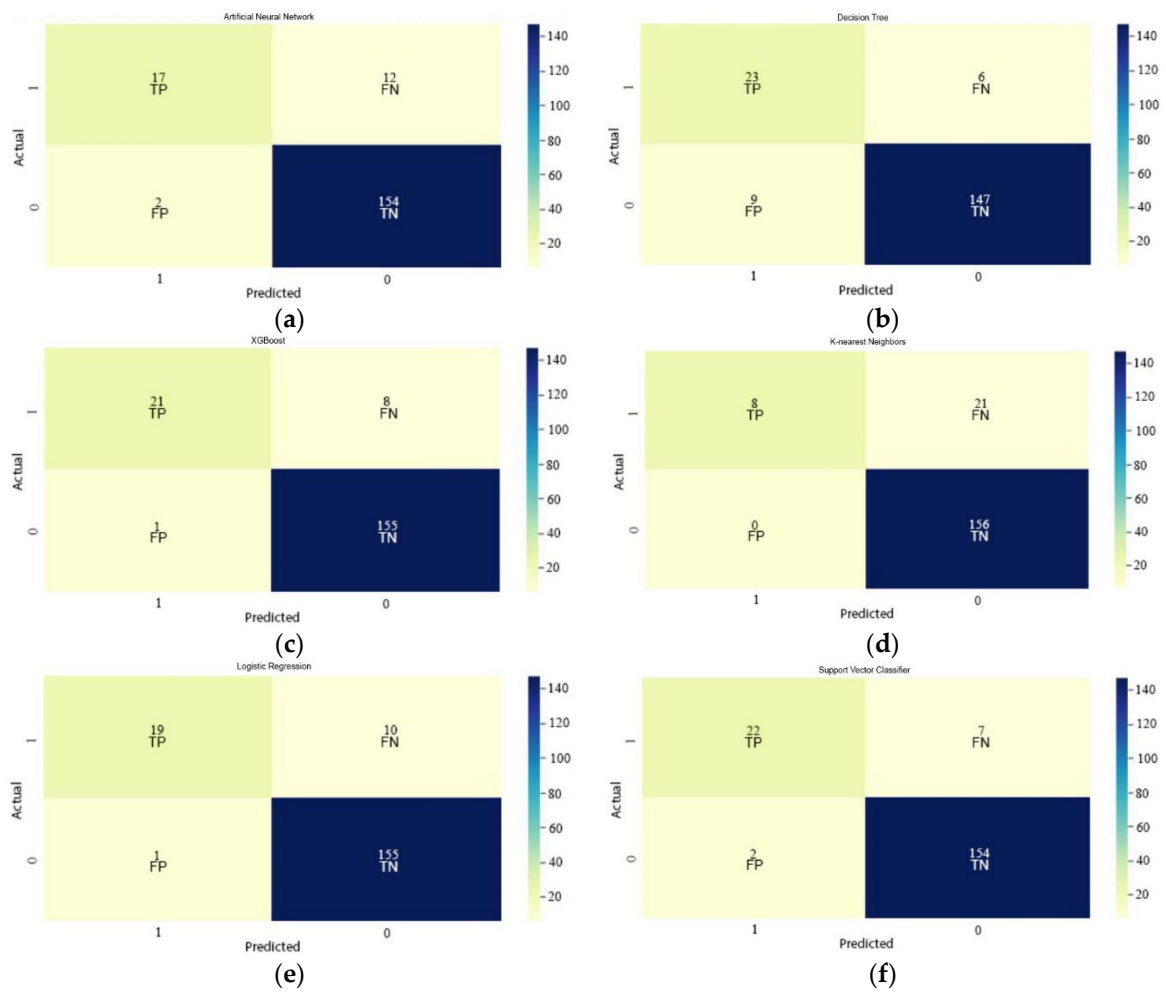

**Figure S2.** Confusion matrix of six machine learning algorithms, (a) Artificial Neural Network (b) Decision Tree (c) XGBoost (d) k-nearest Neighbors (e) Logistic Regression (f) Support Vector Machines, with the UCI dataset.
